# Supplementary material
Source: PubMed Central journal article supplement (PMC9894310)

## NMR Spectra

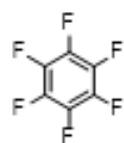

6-F

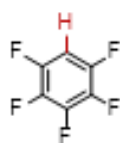

5-F

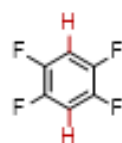

4-F

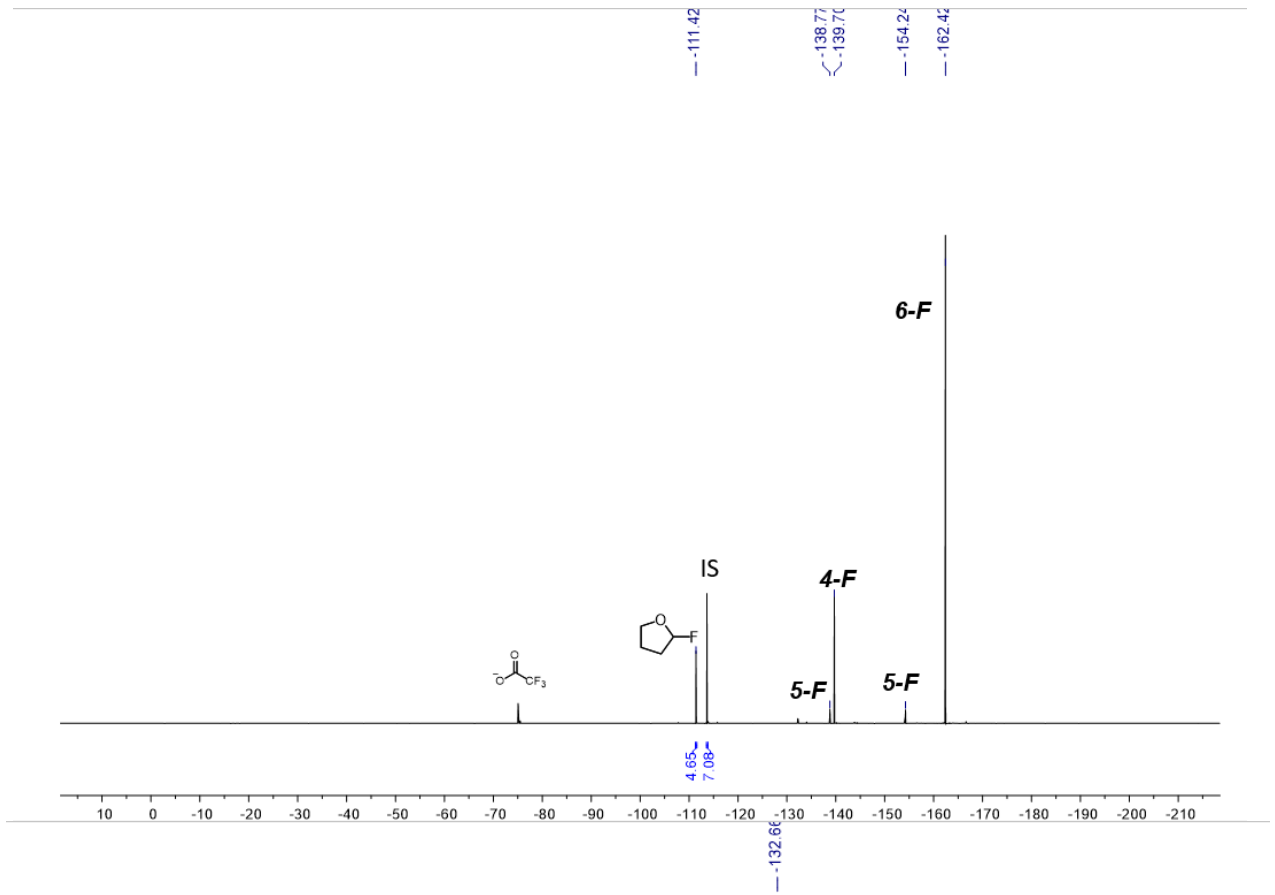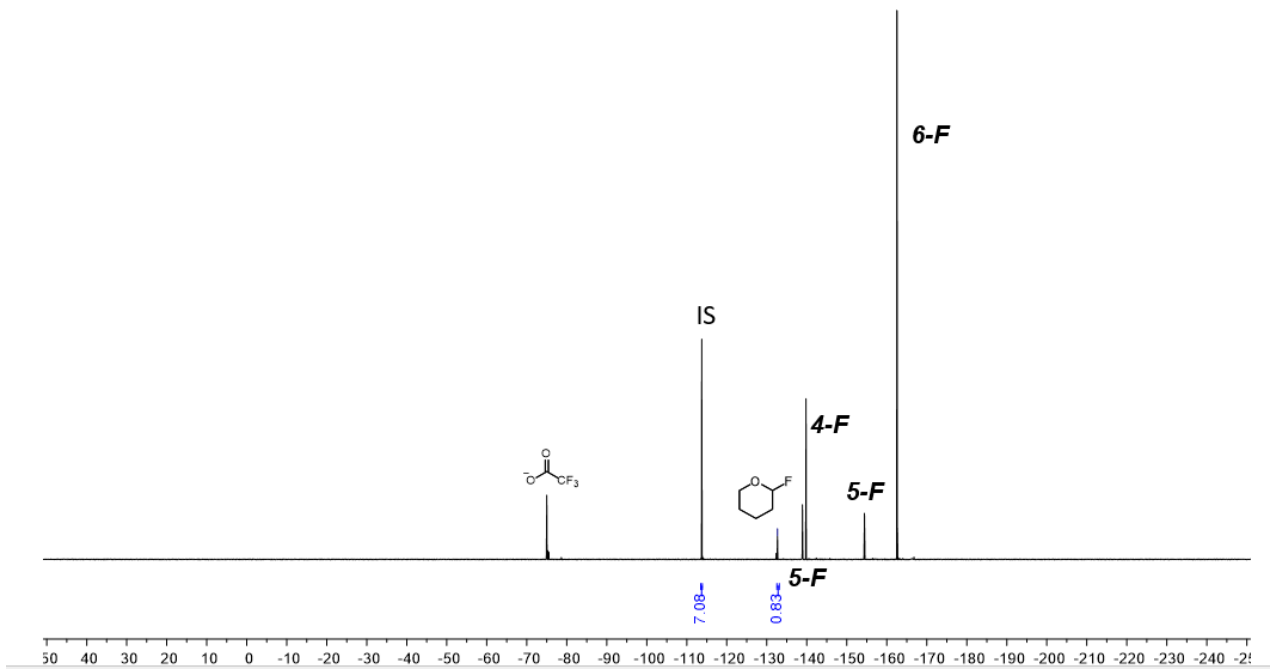

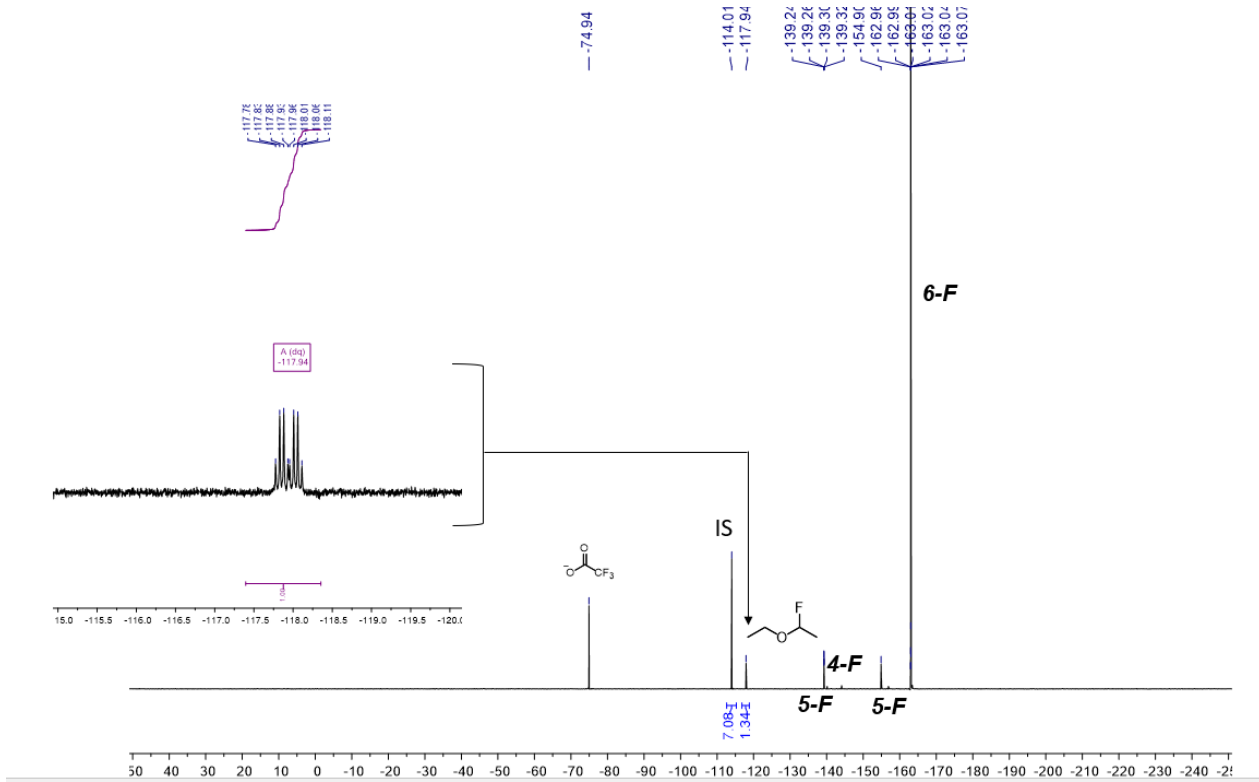

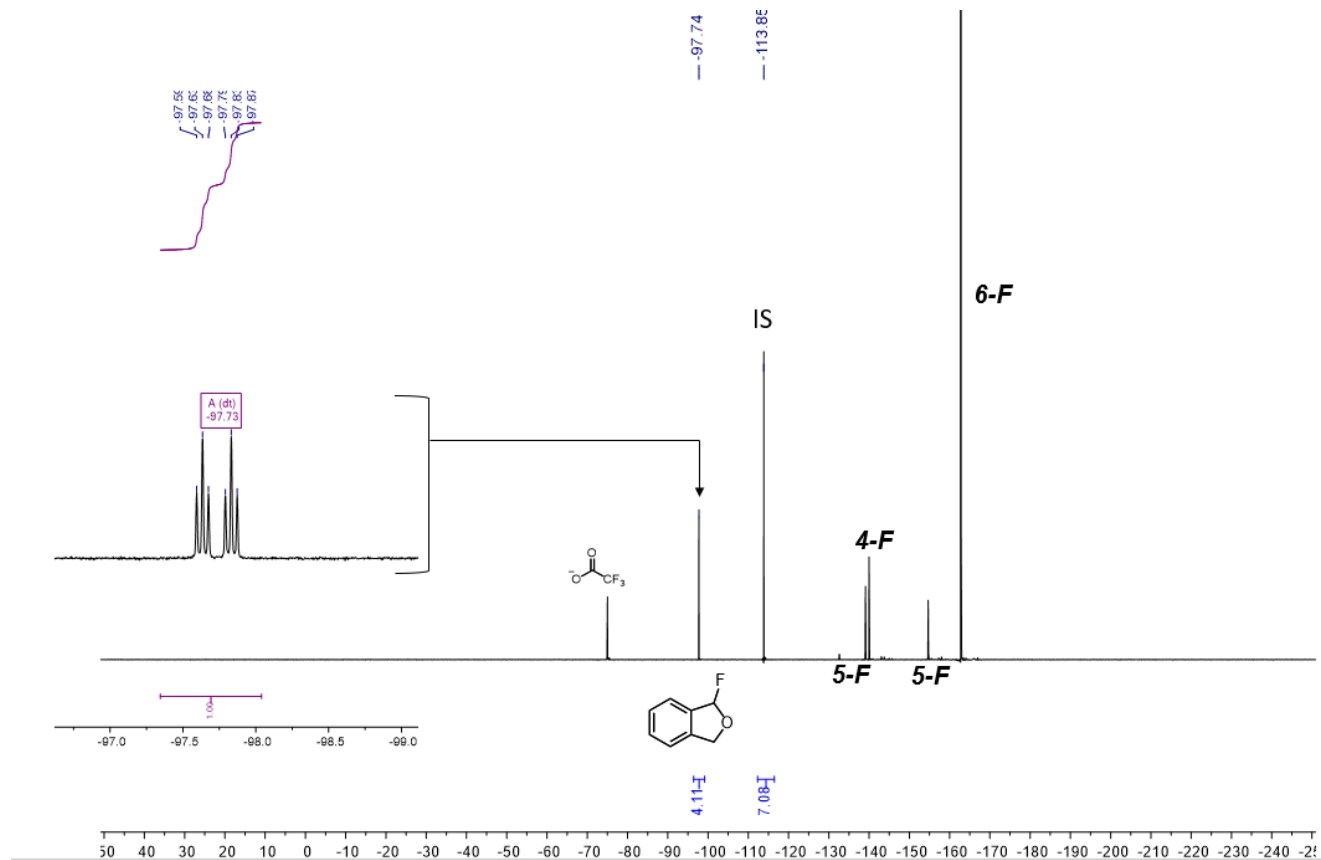

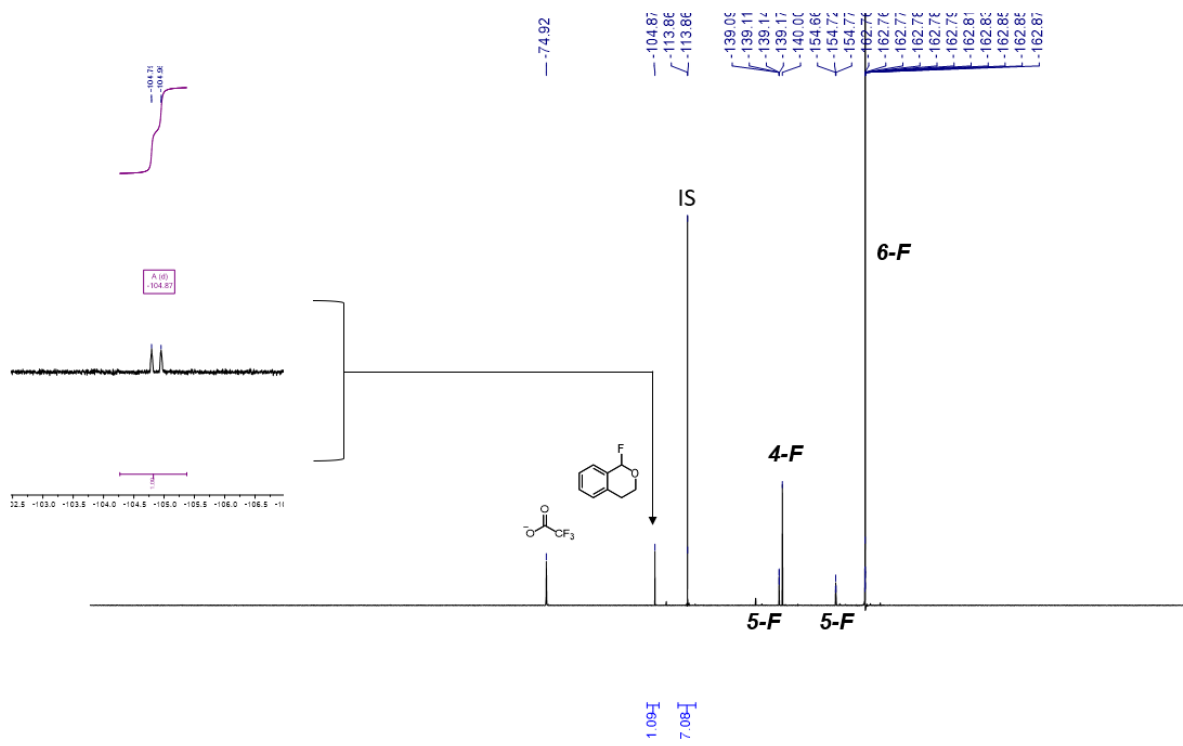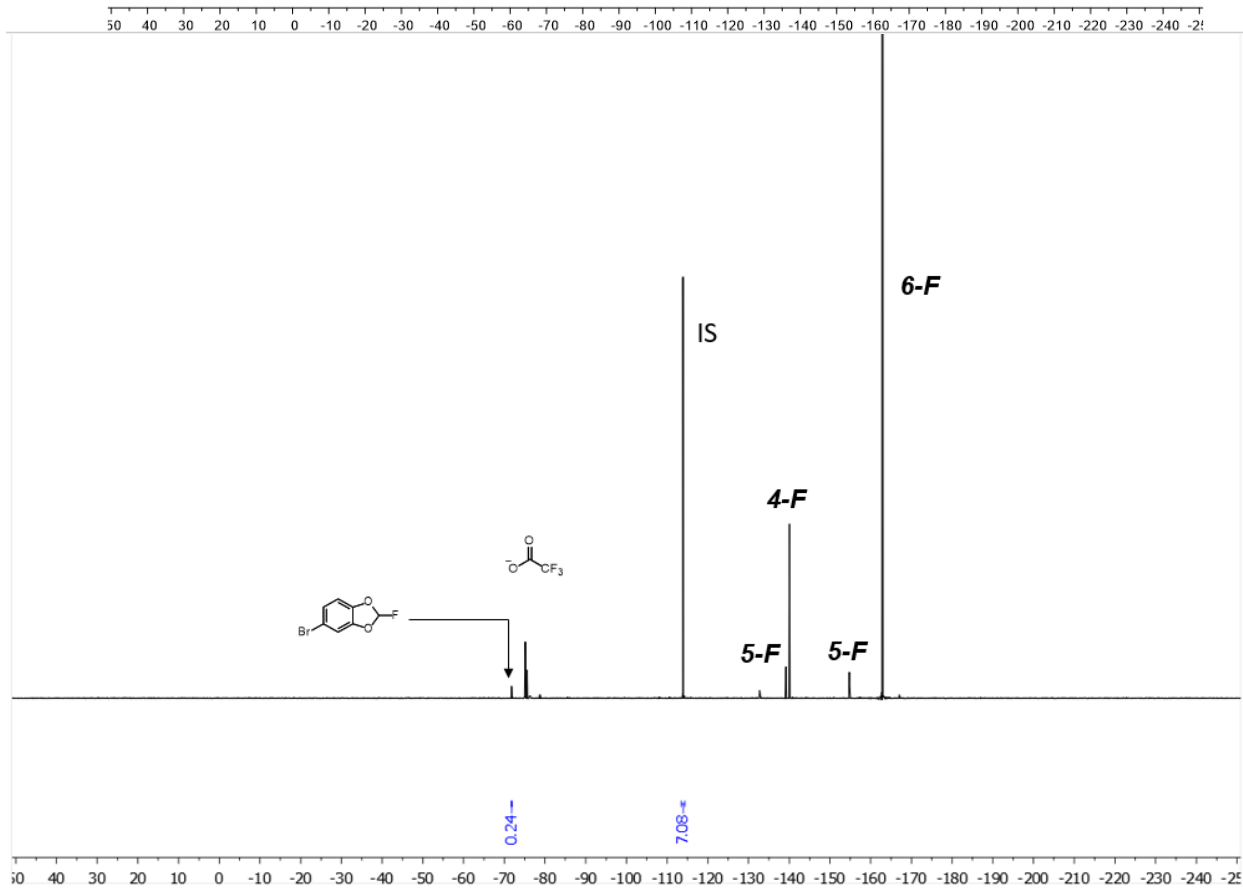

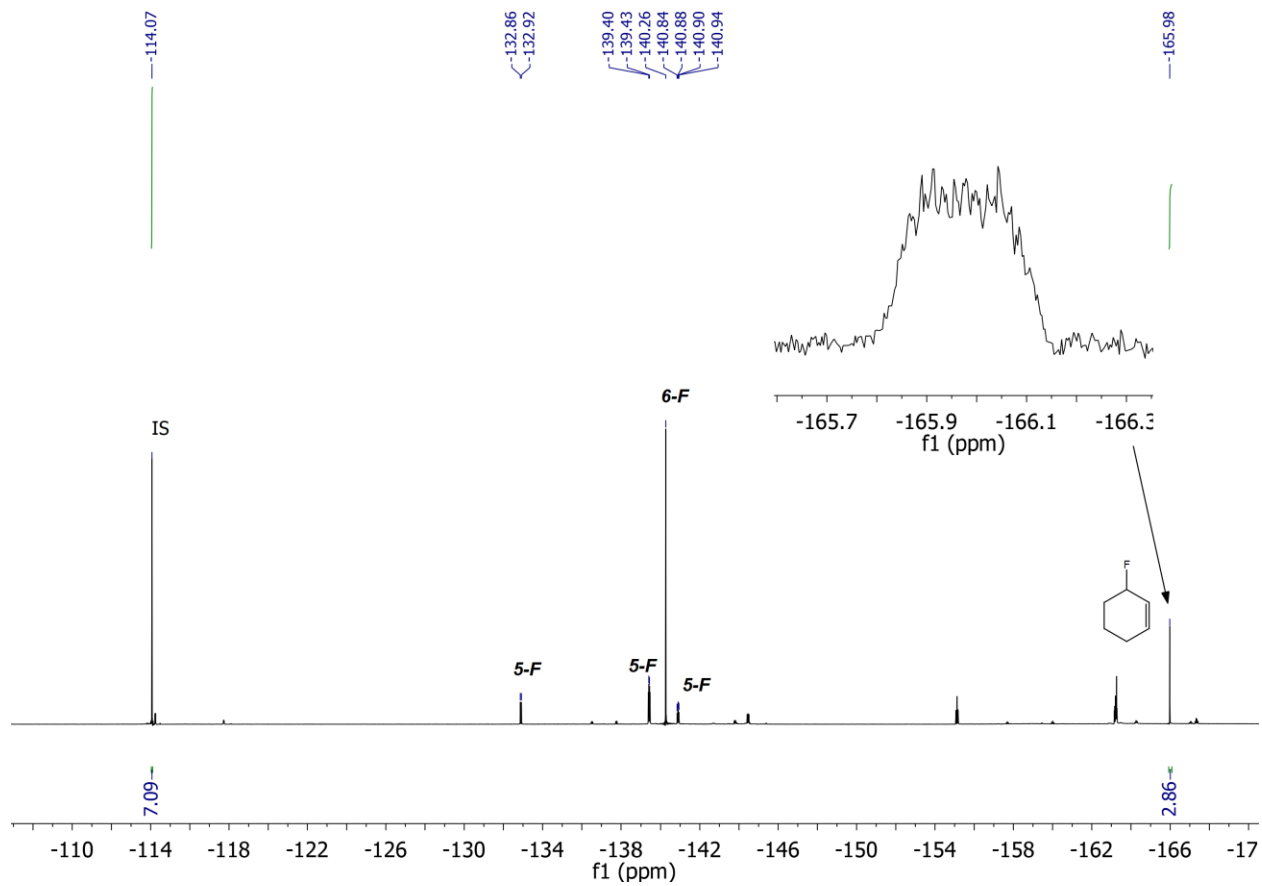

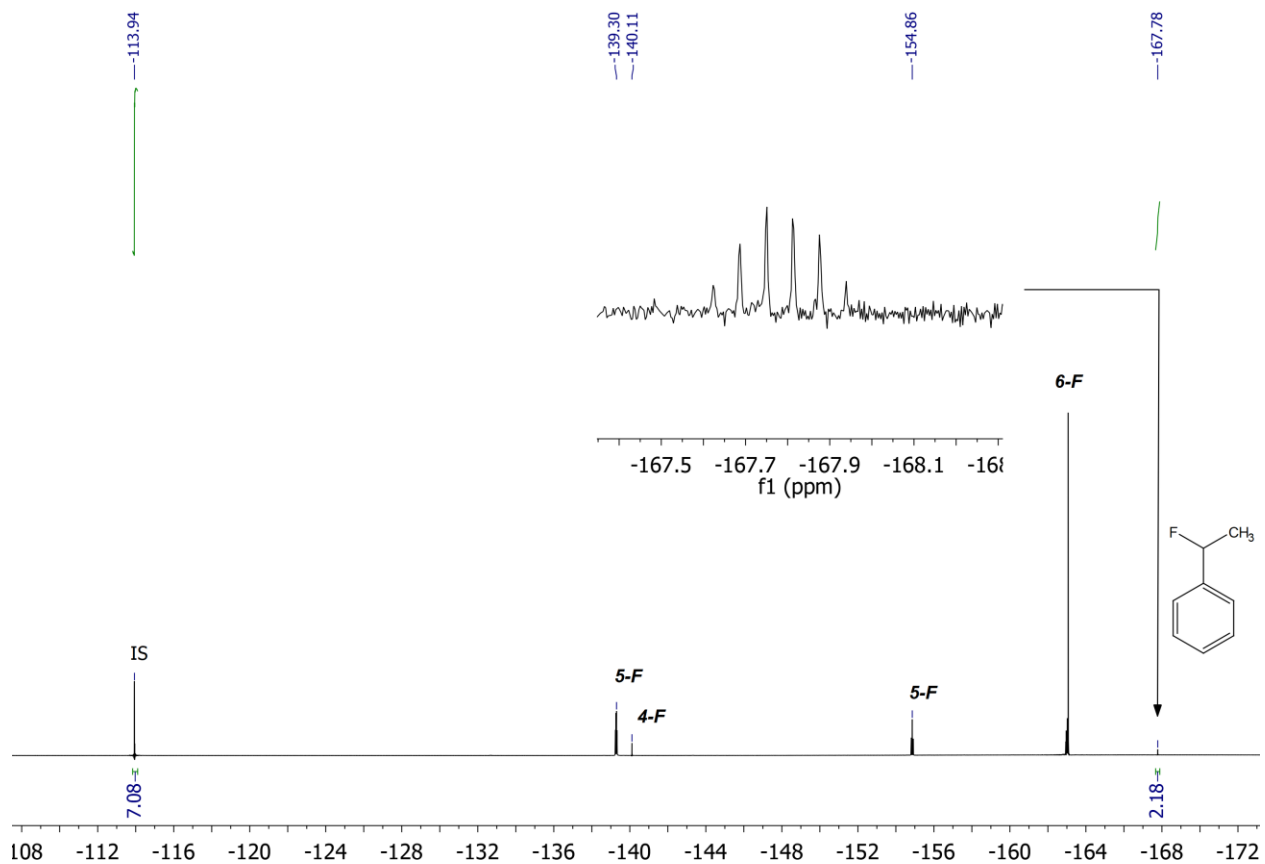

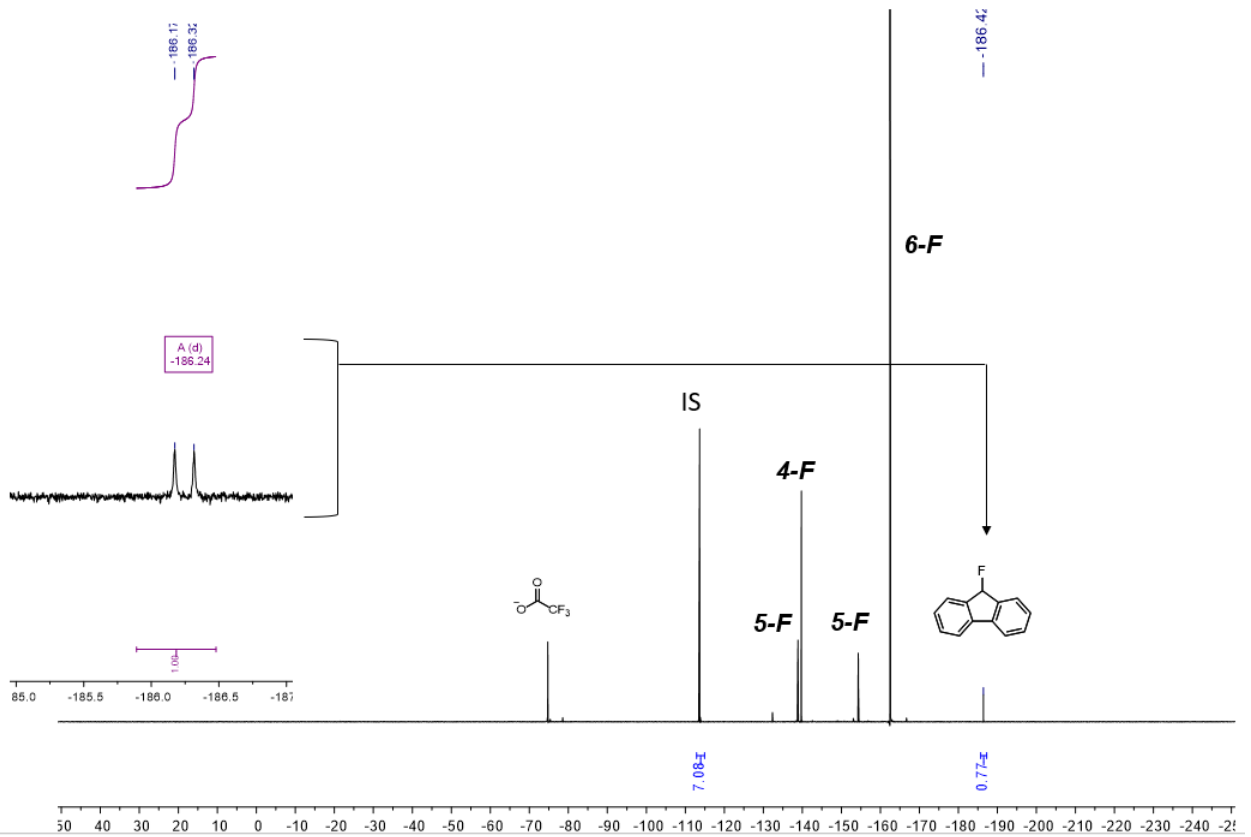



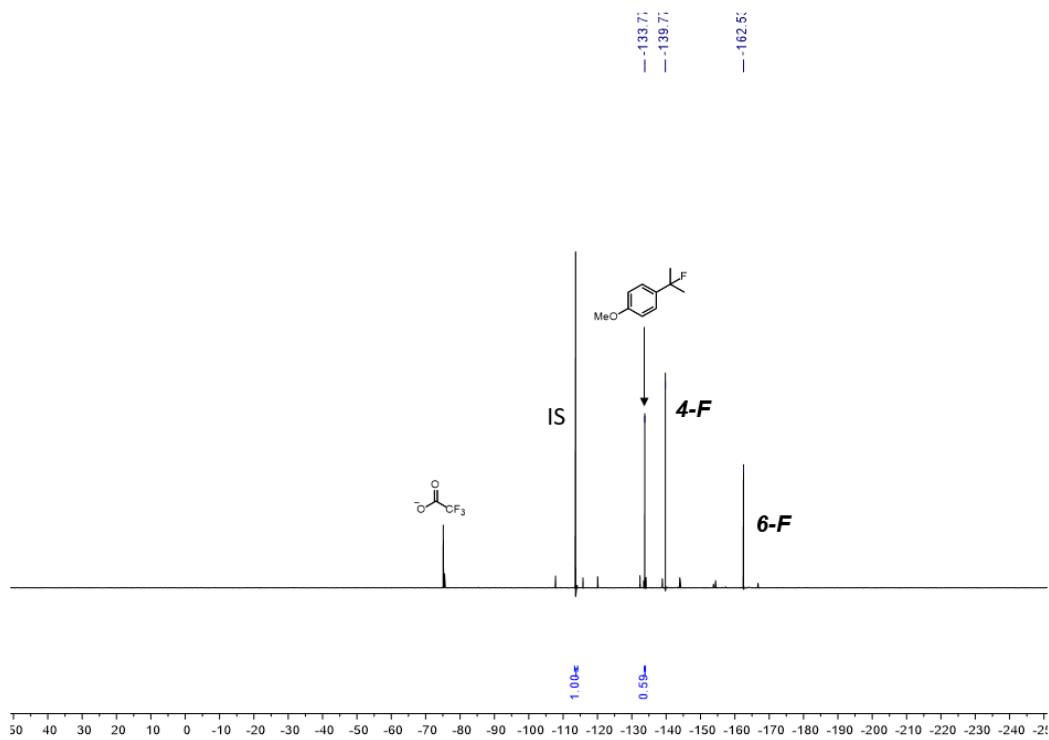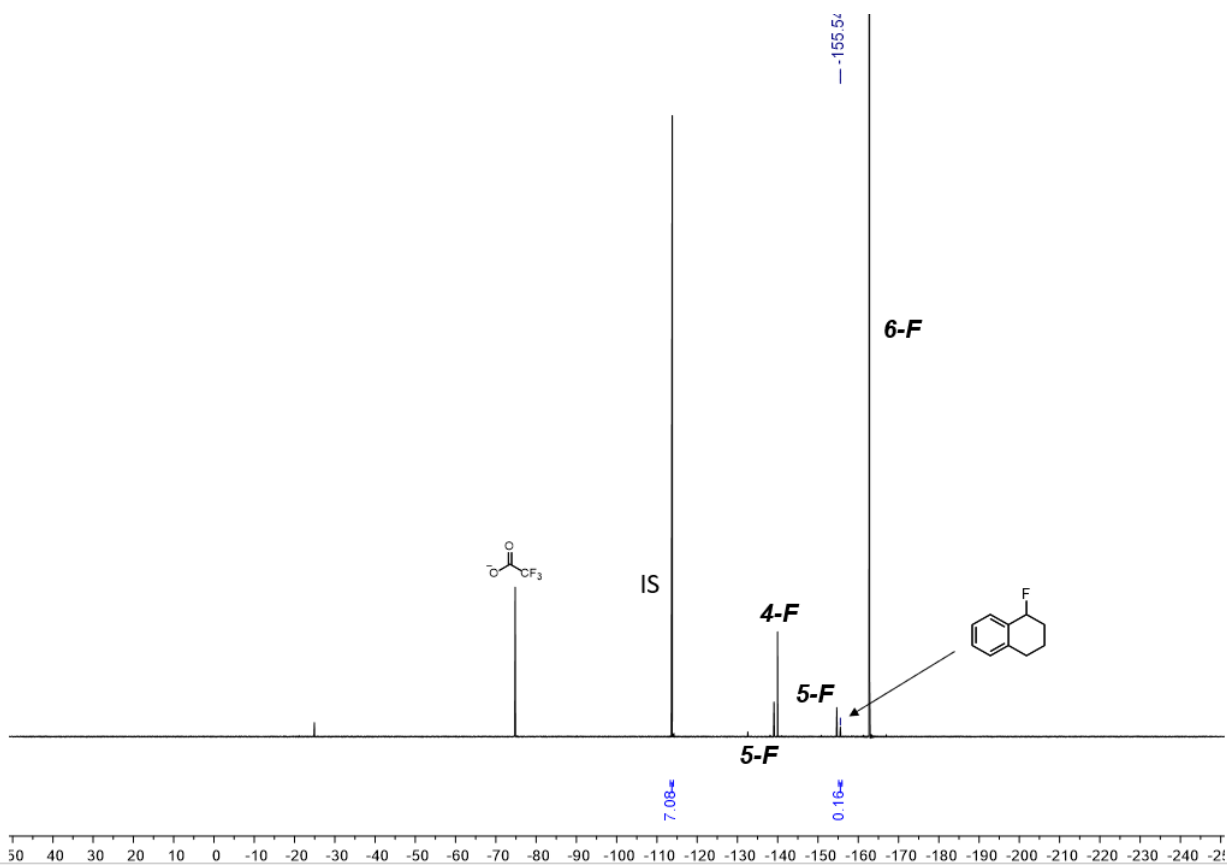

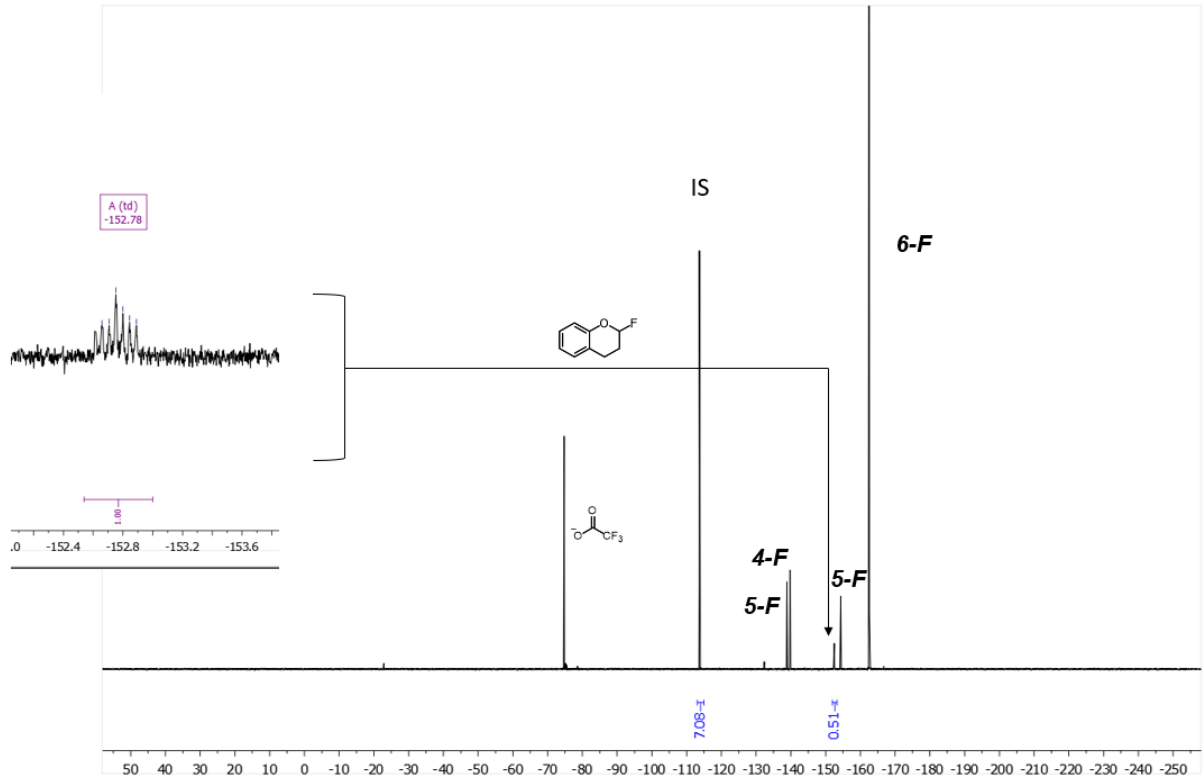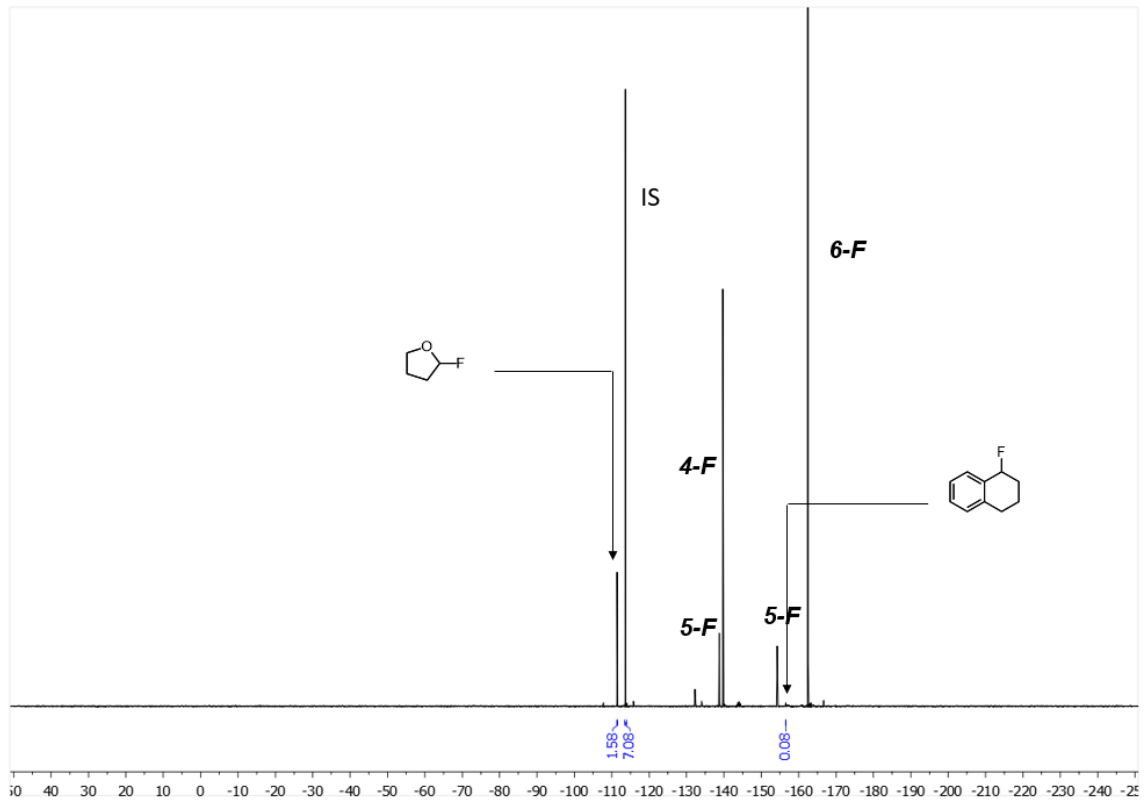

7.16  
7.15  
7.14  
7.13  
7.12  
4.06  
4.06  
4.07  
4.06  
4.06  
4.06  
3.94  
3.93  
3.92  
3.91  
3.90  
3.89  
3.88  
3.77  
3.76  
3.75  
3.74  
3.74  
2.94  
2.92  
2.90  
2.88  
2.77  
2.76  
2.75  
2.74  
2.73  
2.72  
2.71  
2.69  
2.68  
2.67  
2.66  
2.65  
2.64  
2.63  
2.62  
2.61  
2.60  
1.94  
1.94  
1.93  
1.93  
1.92  
1.92  
1.91  
1.91  
1.90  
1.89  
1.88  
1.87  
1.87  
1.86  
1.86  
1.85  
1.85  
1.84  
1.83  
1.82  
1.81  
1.80  
1.79  
1.78  
1.77  
1.76  
1.75  
1.74  
1.73  
1.72  
1.71  
1.70  
1.69  
1.68  
1.67  
1.66  
1.65  
1.64  
1.63  
1.62  
1.61  
1.60  
1.59  
1.58  
1.57  
1.56  
1.55  
1.54  
1.53  
1.52  
1.51  
1.50  
1.49  
1.48  
1.47  
1.46  
1.45  
1.44  
1.43  
1.42  
1.41  
1.40  
1.39  
1.38  
1.37  
1.36  
1.35  
1.34  
1.33  
1.32  
1.31  
1.30  
1.29  
1.28  
1.27  
1.26  
1.25  
1.24  
1.23  
1.22  
1.21  
1.20  
1.19  
1.18  
1.17  
1.16  
1.15  
1.14  
1.13  
1.12  
1.11  
1.10  
1.09  
1.08  
1.07  
1.06  
1.05  
1.04  
1.03  
1.02  
1.01  
1.00  
0.99  
0.98  
0.97  
0.96  
0.95  
0.94  
0.93  
0.92  
0.91  
0.90  
0.89  
0.88  
0.87  
0.86  
0.85  
0.84  
0.83  
0.82  
0.81  
0.80  
0.79  
0.78  
0.77  
0.76  
0.75  
0.74  
0.73  
0.72  
0.71  
0.70  
0.69  
0.68  
0.67  
0.66  
0.65  
0.64  
0.63  
0.62  
0.61  
0.60  
0.59  
0.58  
0.57  
0.56  
0.55  
0.54  
0.53  
0.52  
0.51  
0.50  
0.49  
0.48  
0.47  
0.46  
0.45  
0.44  
0.43  
0.42  
0.41  
0.40  
0.39  
0.38  
0.37  
0.36  
0.35  
0.34  
0.33  
0.32  
0.31  
0.30  
0.29  
0.28  
0.27  
0.26  
0.25  
0.24  
0.23  
0.22  
0.21  
0.20  
0.19  
0.18  
0.17  
0.16  
0.15  
0.14  
0.13  
0.12  
0.11  
0.10  
0.09  
0.08  
0.07  
0.06  
0.05  
0.04  
0.03  
0.02  
0.01  
0.00  
-0.01  
-0.02  
-0.03  
-0.04  
-0.05  
-0.06  
-0.07  
-0.08  
-0.09  
-0.10  
-0.11  
-0.12  
-0.13  
-0.14  
-0.15  
-0.16  
-0.17  
-0.18  
-0.19  
-0.20  
-0.21  
-0.22  
-0.23  
-0.24  
-0.25  
-0.26  
-0.27  
-0.28  
-0.29  
-0.30  
-0.31  
-0.32  
-0.33  
-0.34  
-0.35  
-0.36  
-0.37  
-0.38  
-0.39  
-0.40  
-0.41  
-0.42  
-0.43  
-0.44  
-0.45  
-0.46  
-0.47  
-0.48  
-0.49  
-0.50  
-0.51  
-0.52  
-0.53  
-0.54  
-0.55  
-0.56  
-0.57  
-0.58  
-0.59  
-0.60  
-0.61  
-0.62  
-0.63  
-0.64  
-0.65  
-0.66  
-0.67  
-0.68  
-0.69  
-0.70  
-0.71  
-0.72  
-0.73  
-0.74  
-0.75  
-0.76  
-0.77  
-0.78  
-0.79  
-0.80  
-0.81  
-0.82  
-0.83  
-0.84  
-0.85  
-0.86  
-0.87  
-0.88  
-0.89  
-0.90  
-0.91  
-0.92  
-0.93  
-0.94  
-0.95  
-0.96  
-0.97  
-0.98  
-0.99  
-1.00  
-1.01  
-1.02  
-1.03  
-1.04  
-1.05  
-1.06  
-1.07  
-1.08  
-1.09  
-1.10  
-1.11  
-1.12  
-1.13  
-1.14  
-1.15  
-1.16  
-1.17  
-1.18  
-1.19  
-1.20  
-1.21  
-1.22  
-1.23  
-1.24  
-1.25  
-1.26  
-1.27  
-1.28  
-1.29  
-1.30  
-1.31  
-1.32  
-1.33  
-1.34  
-1.35  
-1.36  
-1.37  
-1.38  
-1.39  
-1.40  
-1.41  
-1.42  
-1.43  
-1.44  
-1.45  
-1.46  
-1.47  
-1.48  
-1.49  
-1.50  
-1.51  
-1.52  
-1.53  
-1.54  
-1.55  
-1.56  
-1.57  
-1.58  
-1.59  
-1.60  
-1.61  
-1.62  
-1.63  
-1.64  
-1.65  
-1.66  
-1.67  
-1.68  
-1.69  
-1.70  
-1.71  
-1.72  
-1.73  
-1.74  
-1.75  
-1.76  
-1.77  
-1.78  
-1.79  
-1.80  
-1.81  
-1.82  
-1.83  
-1.84  
-1.85  
-1.86  
-1.87  
-1.88  
-1.89  
-1.90  
-1.91  
-1.92  
-1.93  
-1.94  
-1.95  
-1.96  
-1.97  
-1.98  
-1.99  
-2.00  
-2.01  
-2.02  
-2.03  
-2.04  
-2.05  
-2.06  
-2.07  
-2.08  
-2.09  
-2.10  
-2.11  
-2.12  
-2.13  
-2.14  
-2.15  
-2.16  
-2.17  
-2.18  
-2.19  
-2.20  
-2.21  
-2.22  
-2.23  
-2.24  
-2.25  
-2.26  
-2.27  
-2.28  
-2.29  
-2.30  
-2.31  
-2.32  
-2.33  
-2.34  
-2.35  
-2.36  
-2.37  
-2.38  
-2.39  
-2.40  
-2.41  
-2.42  
-2.43  
-2.44  
-2.45  
-2.46  
-2.47  
-2.48  
-2.49  
-2.50  
-2.51  
-2.52  
-2.53  
-2.54  
-2.55  
-2.56  
-2.57  
-2.58  
-2.59  
-2.60  
-2.61  
-2.62  
-2.63  
-2.64  
-2.65  
-2.66  
-2.67  
-2.68  
-2.69  
-2.70  
-2.71  
-2.72  
-2.73  
-2.74  
-2.75  
-2.76  
-2.77  
-2.78  
-2.79  
-2.80  
-2.81  
-2.82  
-2.83  
-2.84  
-2.85  
-2.86  
-2.87  
-2.88  
-2.89  
-2.90  
-2.91  
-2.92  
-2.93  
-2.94  
-2.95  
-2.96  
-2.97  
-2.98  
-2.99  
-3.00  
-3.01  
-3.02  
-3.03  
-3.04  
-3.05  
-3.06  
-3.07  
-3.08  
-3.09  
-3.10  
-3.11  
-3.12  
-3.13  
-3.14  
-3.15  
-3.16  
-3.17  
-3.18  
-3.19  
-3.20  
-3.21  
-3.22  
-3.23  
-3.24  
-3.25  
-3.26  
-3.27  
-3.28  
-3.29  
-3.30  
-3.31  
-3.32  
-3.33  
-3.34  
-3.35  
-3.36  
-3.37  
-3.38  
-3.39  
-3.40  
-3.41  
-3.42  
-3.43  
-3.44  
-3.45  
-3.46  
-3.47  
-3.48  
-3.49  
-3.50  
-3.51  
-3.52  
-3.53  
-3.54  
-3.55  
-3.56  
-3.57  
-3.58  
-3.59  
-3.60  
-3.61  
-3.62  
-3.63  
-3.64  
-3.65  
-3.66  
-3.67  
-3.68  
-3.69  
-3.70  
-3.71  
-3.72  
-3.73  
-3.74  
-3.75  
-3.76  
-3.77  
-3.78  
-3.79  
-3.80  
-3.81  
-3.82  
-3.83  
-3.84  
-3.85  
-3.86  
-3.87  
-3.88  
-3.89  
-3.90  
-3.91  
-3.92  
-3.93  
-3.94  
-3.95  
-3.96  
-3.97  
-3.98  
-3.99  
-4.00

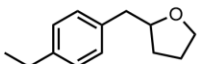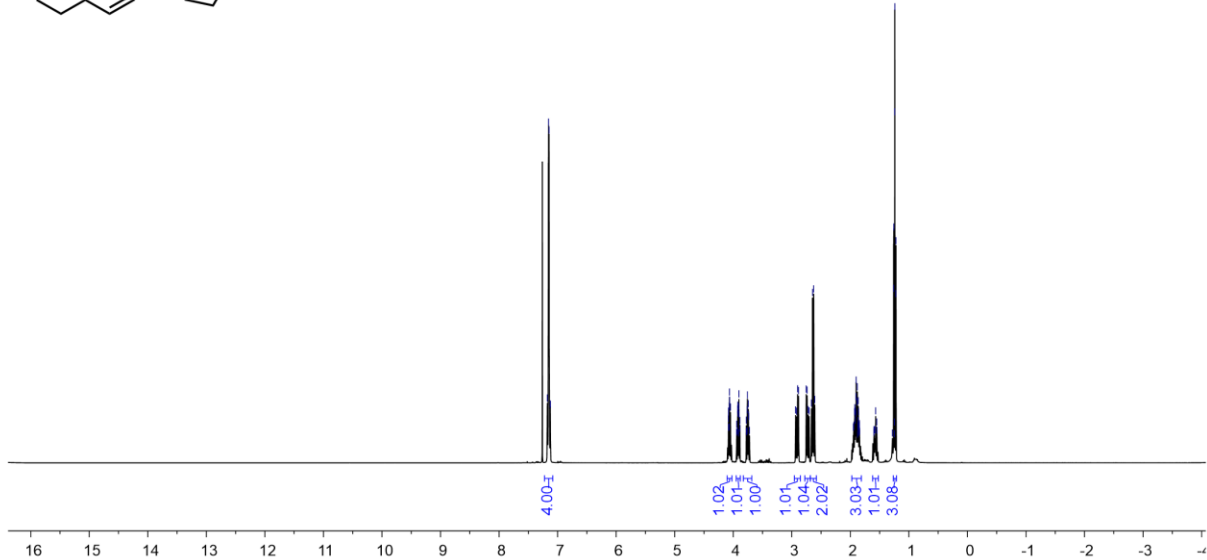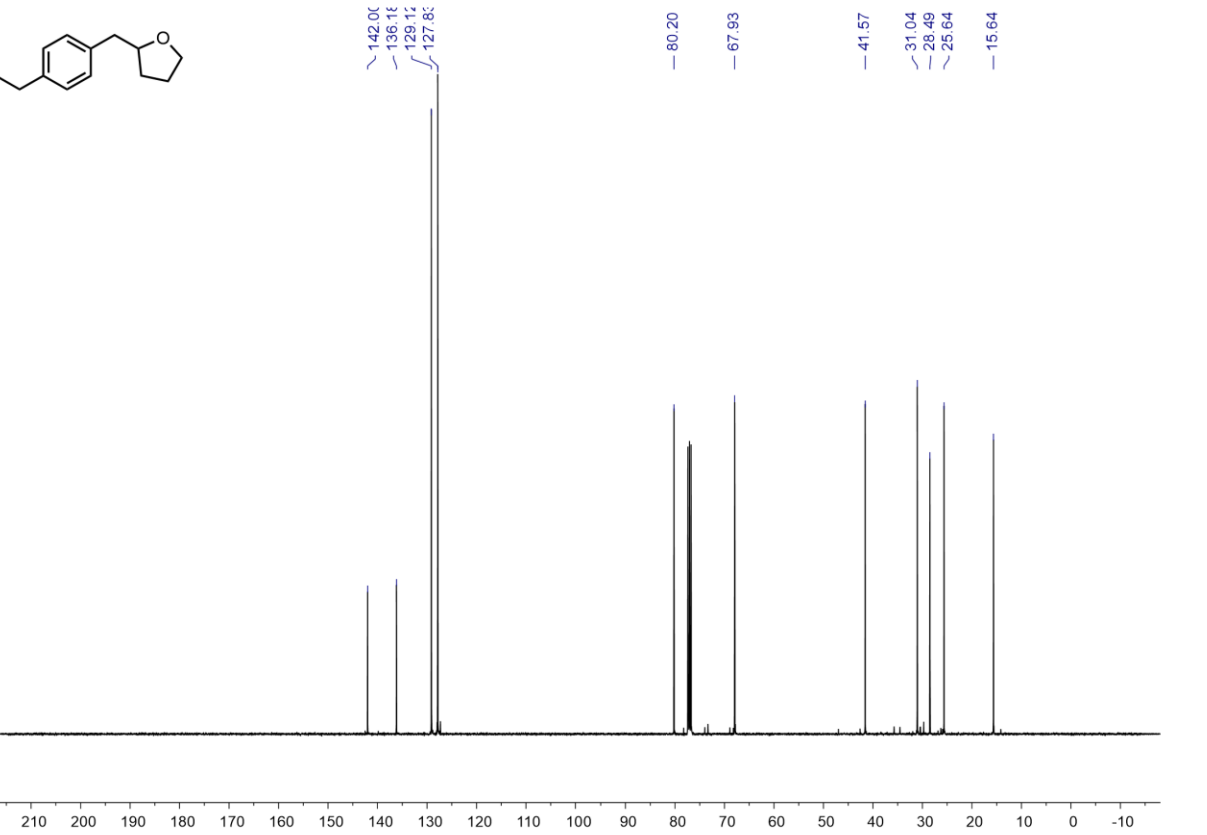

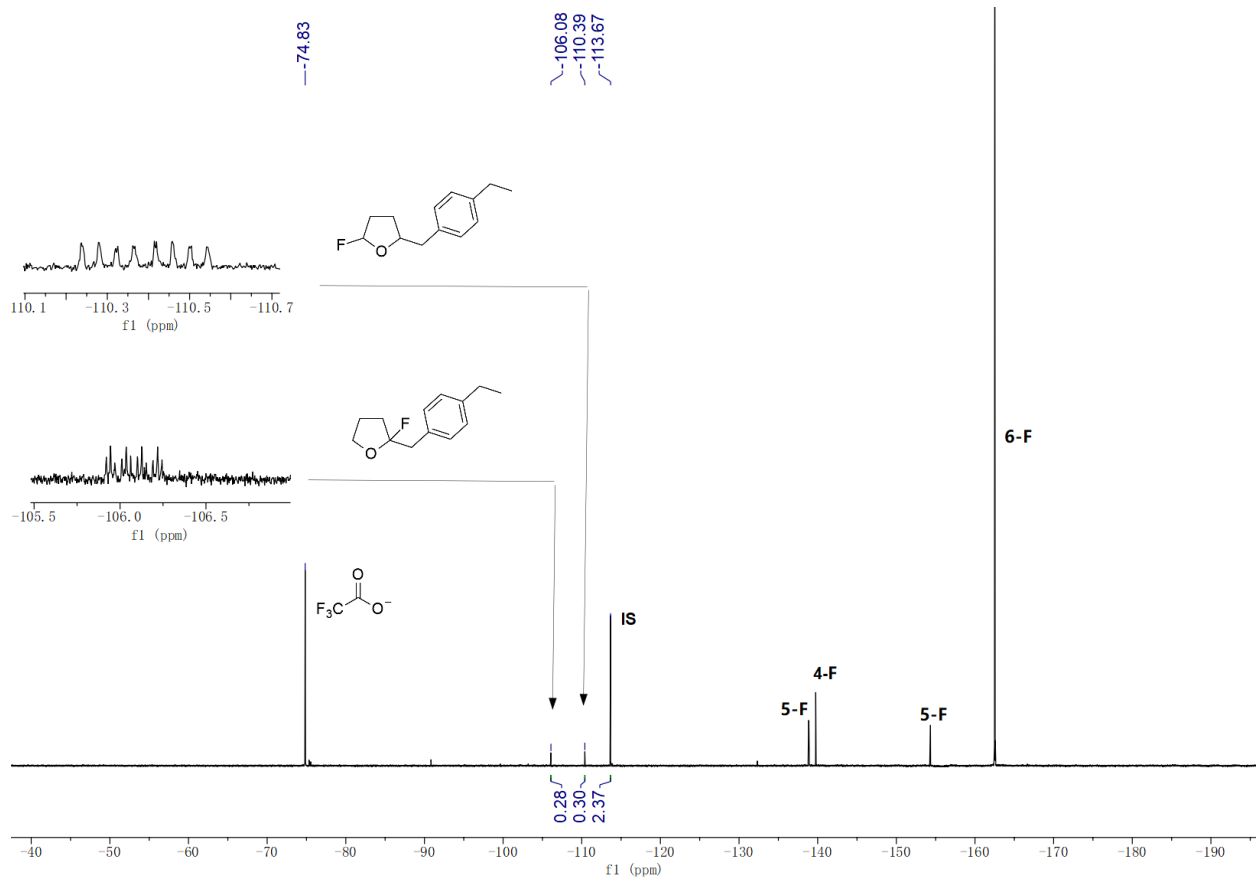

Supplement: NIHMS1864410-supplement-2.pdf [file NIHMS1864410-supplement-2.pdf]
